# Supplementary material for: Crystalline restacking of 2D-materials from their nanosheets suspensions
Source: Royal Society of Chemistry journal article supplement (doi:10.1039/d3nr04885c), 2023-01-01
Supplement: d3nr04885c2.pdf [file d3nr04885c2.pdf]

31/10/2023 02:41

## Supplementary Information, SI I, for

# Crystalline Restacking of 2D-Materials from their Nanosheets Suspensions

Lina Cherni,<sup>1</sup> Karin El Rifaii,<sup>2</sup> Henricus H. Wensink,<sup>2\*</sup> Sarah M. Chevrier,<sup>1</sup> Claire Goldmann,<sup>2</sup> Laurent J. Michot,<sup>3</sup> Patrick Davidson,<sup>2\*</sup> Jean-Christophe P. Gabriel,<sup>1\*</sup>

<sup>1</sup> Université Paris-Saclay, CEA, CNRS, NIMBE-LICSEN, 91191 Gif-sur-Yvette, France.

<sup>2</sup> Laboratoire de Physique des Solides, Université Paris-Saclay, CNRS, 91405 Orsay, France.

<sup>3</sup> Laboratory of Physical Chemistry of Electrolytes and Interfacial Nanosystems (PHENIX), Sorbonne Université, CNRS, 75005 Paris, France.

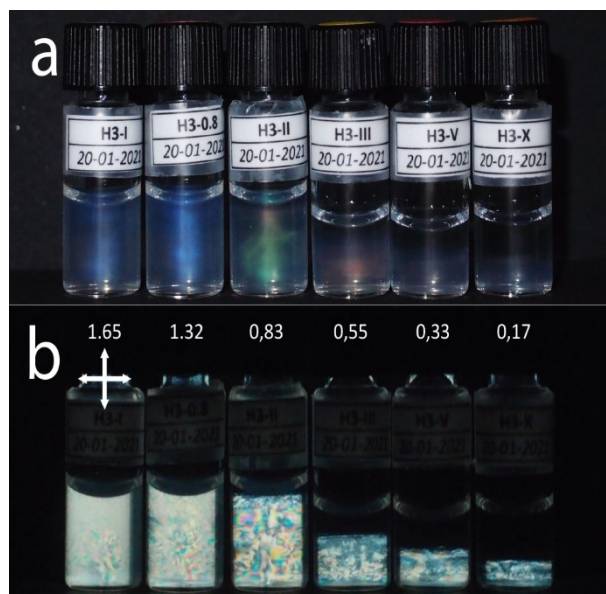

**Figure SI 1.** Photographs of a series of sample tubes with  $\text{H}_3\text{Sb}_3\text{P}_2\text{O}_{14}$  weight fraction decreasing from left to right: 1.65, 1.32, 0.83, 0.55, 0.33, and 0.17 %w/w observed (a) in natural light and (b) between crossed polarizers.

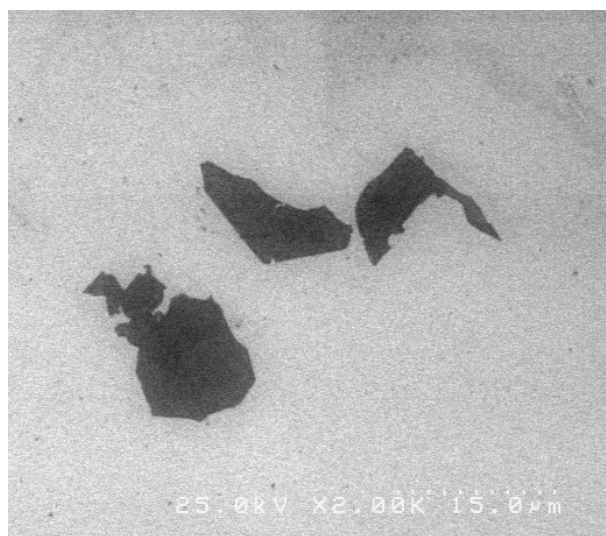

**Figure SI 2.** A typical scanning electron microscopy (SEM) image of  $\text{H}_3\text{Sb}_3\text{P}_2\text{O}_{14}$  nanosheets.

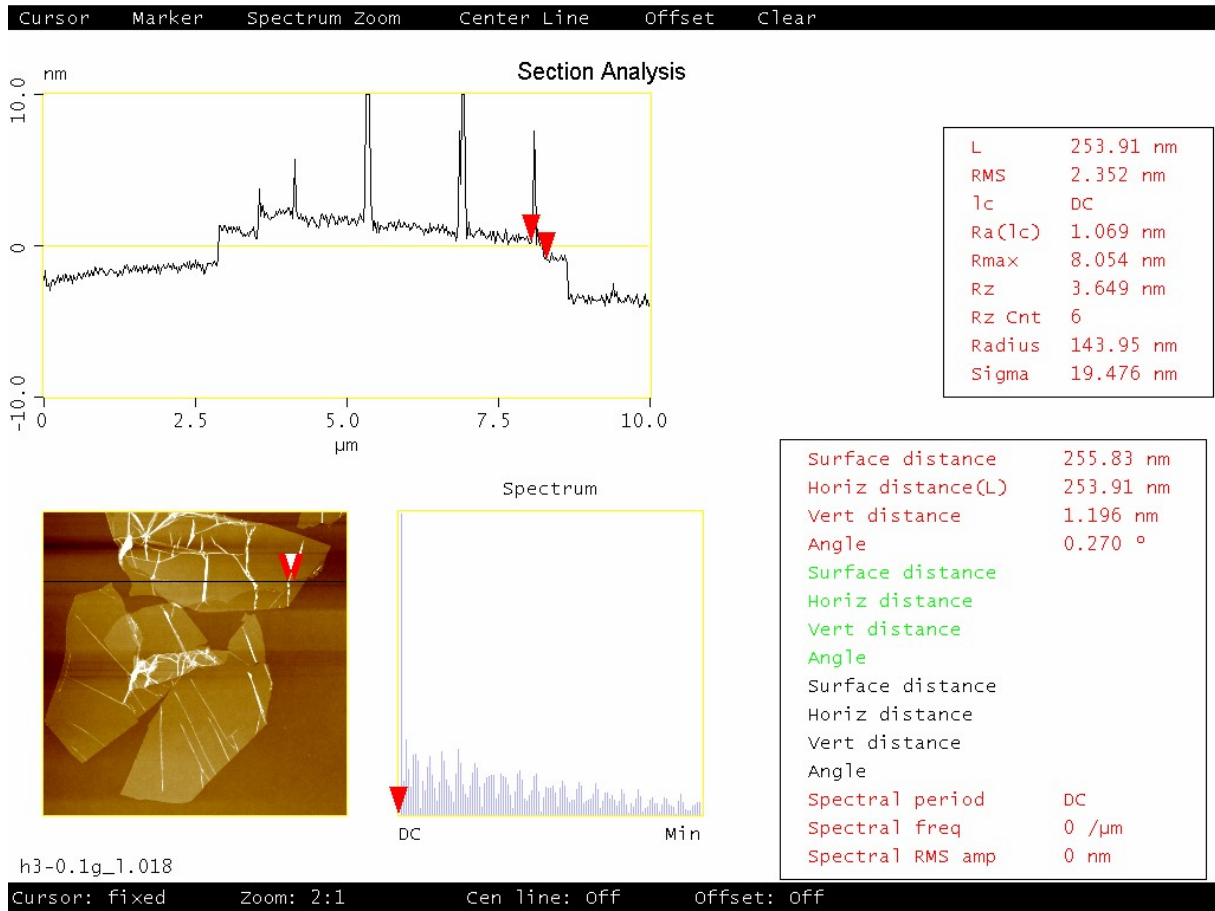

**Figure SI 3.** A typical atomic force microscopy (AFM) image of  $H_3Sb_3P_2O_{14}$  nanosheets with a horizontal cut showing that the nanosheet thickness is  $\approx 1.2$  nm.

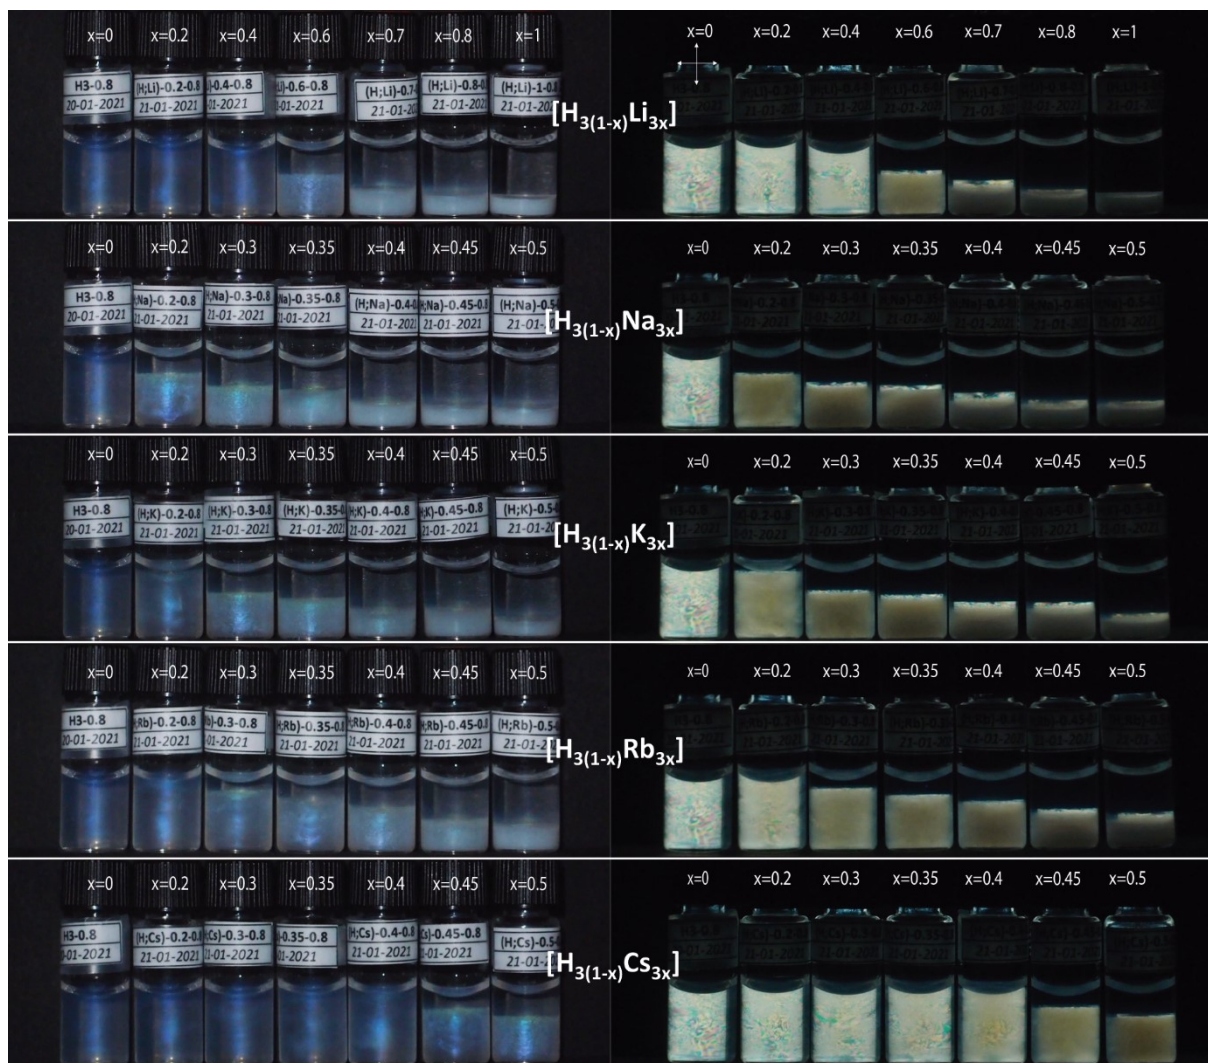

**Figure SI 4.** Photographs of five series of sample tubes observed in natural light (right) and between crossed polarizers (left). For each series, the  $\text{H}_{3(1-x)}\text{M}_{3x}\text{Sb}_3\text{P}_2\text{O}_{14}$  nanosheet weight fraction is kept constant (1.32 %w/w) but the  $x$  value corresponding to the alkaline cation increases from left to right:  $x = 0, 0.2, 0.4, 0.6, 0.7, 0.8,$  and  $1$  for  $\text{Li}^+$  and  $x = 0, 0.2, 0.3, 0.35, 0.4, 0.45,$  and  $0.5$  for the other cations ( $\text{Na}^+, \text{K}^+, \text{Rb}^+, \text{Cs}^+$ ).

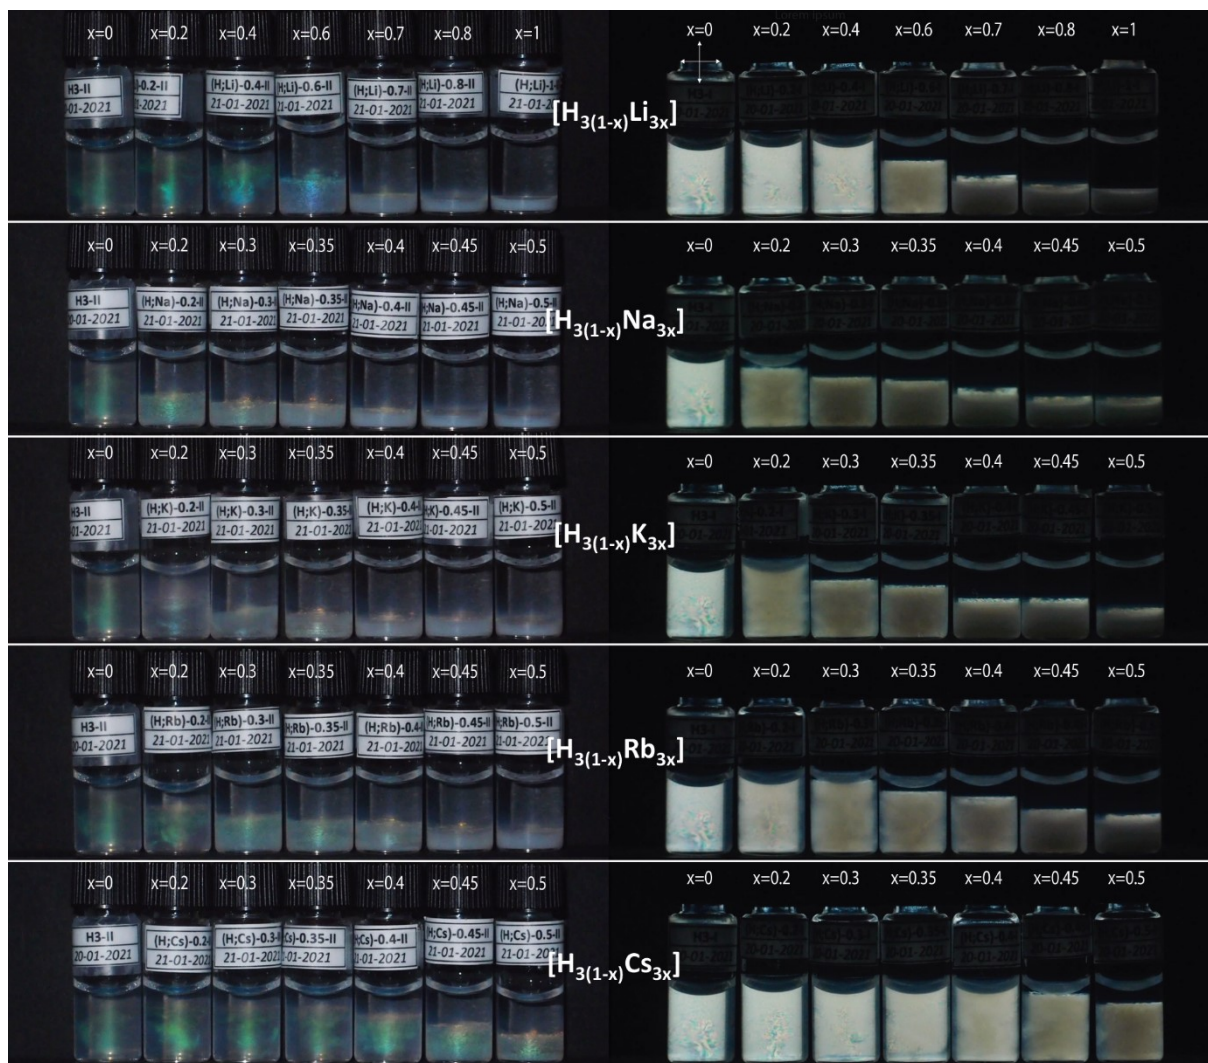

**Figure SI 5.** Photographs of five series of sample tubes observed in natural light (right) and between crossed polarizers (left). For each series, the  $\text{H}_{3(1-x)}\text{M}_{3x}\text{Sb}_3\text{P}_2\text{O}_{14}$  nanosheet weight fraction is kept constant (0.83 %w/w) but the  $x$  value corresponding to the alkaline cation increases from left to right:  $x = 0, 0.2, 0.4, 0.6, 0.7, 0.8,$  and  $1$  for  $\text{Li}^+$  and  $x = 0, 0.2, 0.3, 0.35, 0.4, 0.45,$  and  $0.5$  for the other cations ( $\text{Na}^+, \text{K}^+, \text{Rb}^+, \text{Cs}^+$ ).

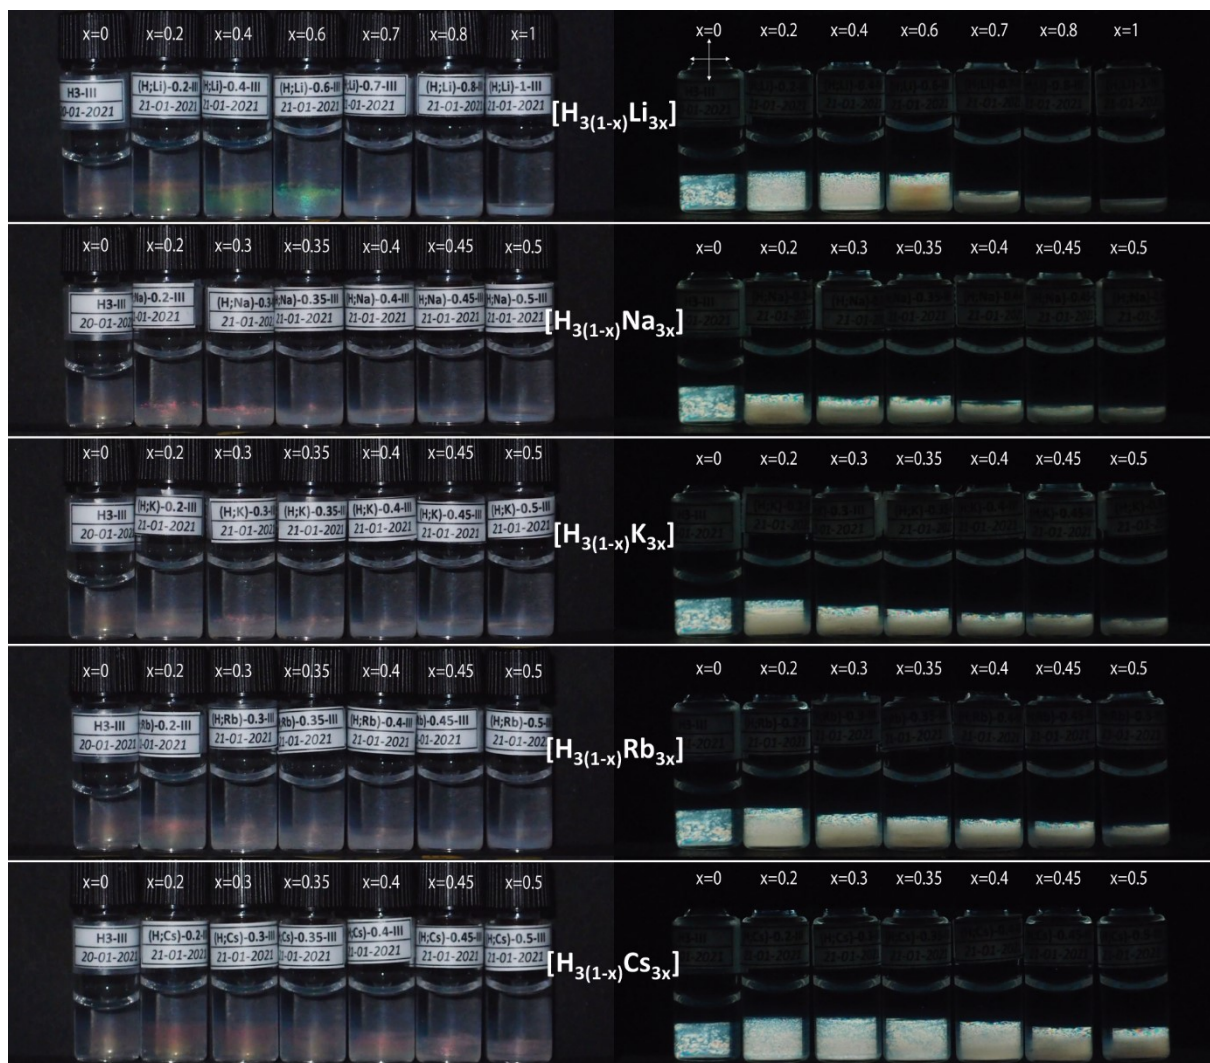

**Figure SI 6.** Photographs of five series of sample tubes observed in natural light (right) and between crossed polarizers (left). For each series, the  $H_{3(1-x)}M_{3x}Sb_3P_2O_{14}$  nanosheet weight fraction is kept constant (0.55 %w/w) but the x value corresponding to the alkaline cation increases from left to right:  $x = 0, 0.2, 0.4, 0.6, 0.7, 0.8,$  and  $1$  for  $Li^+$  and  $x = 0, 0.2, 0.3, 0.35, 0.4, 0.45,$  and  $0.5$  for the other cations ( $Na^+, K^+, Rb^+, Cs^+$ ).

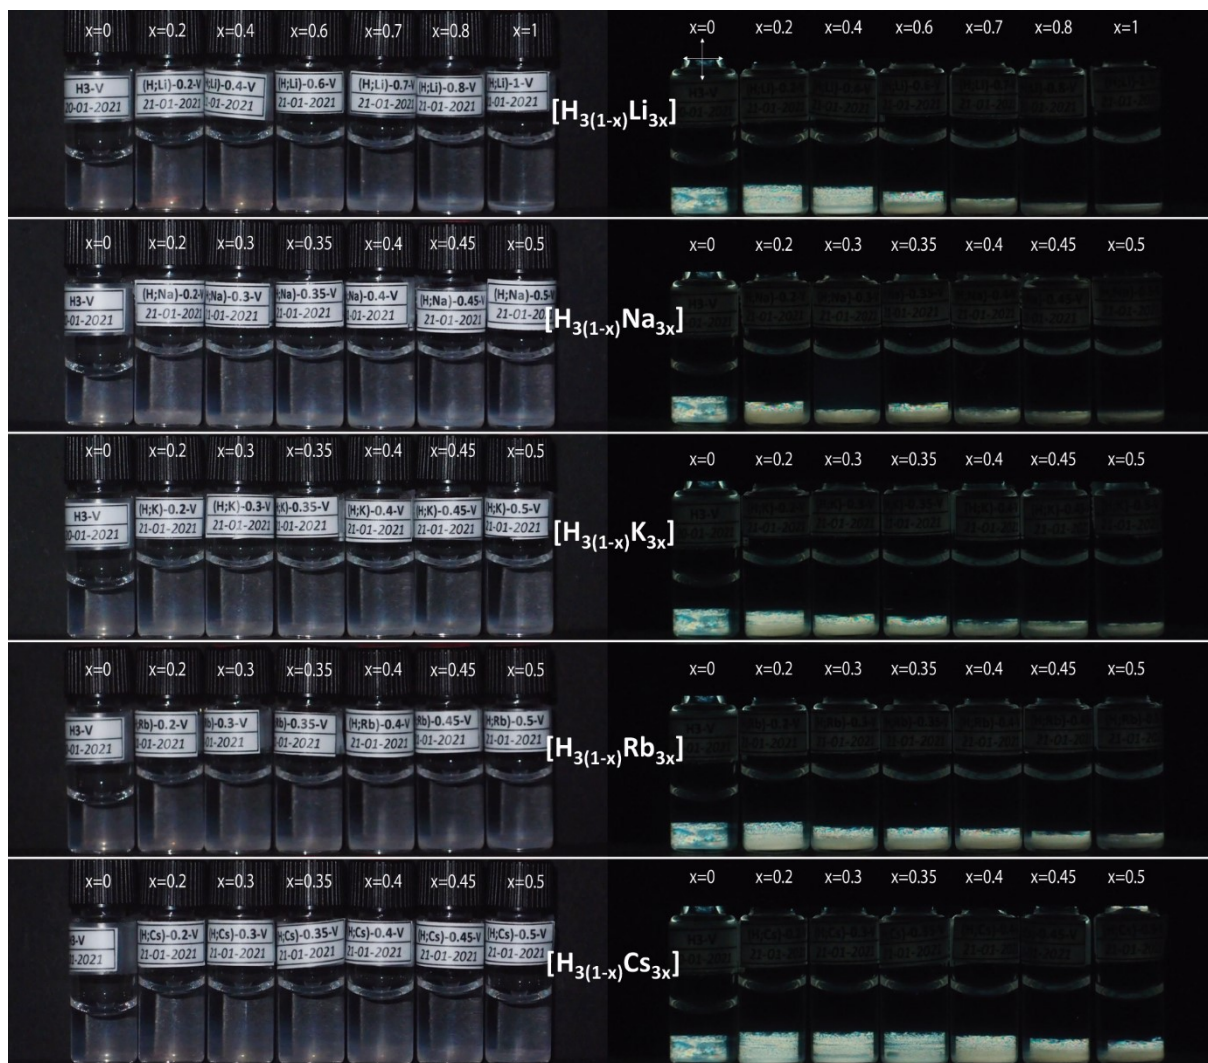

**Figure SI 7.** Photographs of five series of sample tubes observed in natural light (right) and between crossed polarizers (left). For each series, the  $\text{H}_3(1-x)\text{M}_{3x}\text{Sb}_3\text{P}_2\text{O}_{14}$  nanosheet weight fraction is kept constant (0.33 wt %) but the  $x$  value corresponding to the alkali cation present increases from left to right:  $x = 0, 0.2, 0.4, 0.6, 0.7, 0.8$  and  $1$  for  $\text{Li}^+$  and  $x = 0, 0.2, 0.3, 0.35, 0.4, 0.45$  and  $0.5$  for the rest of the cations ( $\text{Na}^+, \text{K}^+, \text{Rb}^+, \text{Cs}^+$ ). The lamellar phase is clearly destabilized by the addition the different cations.

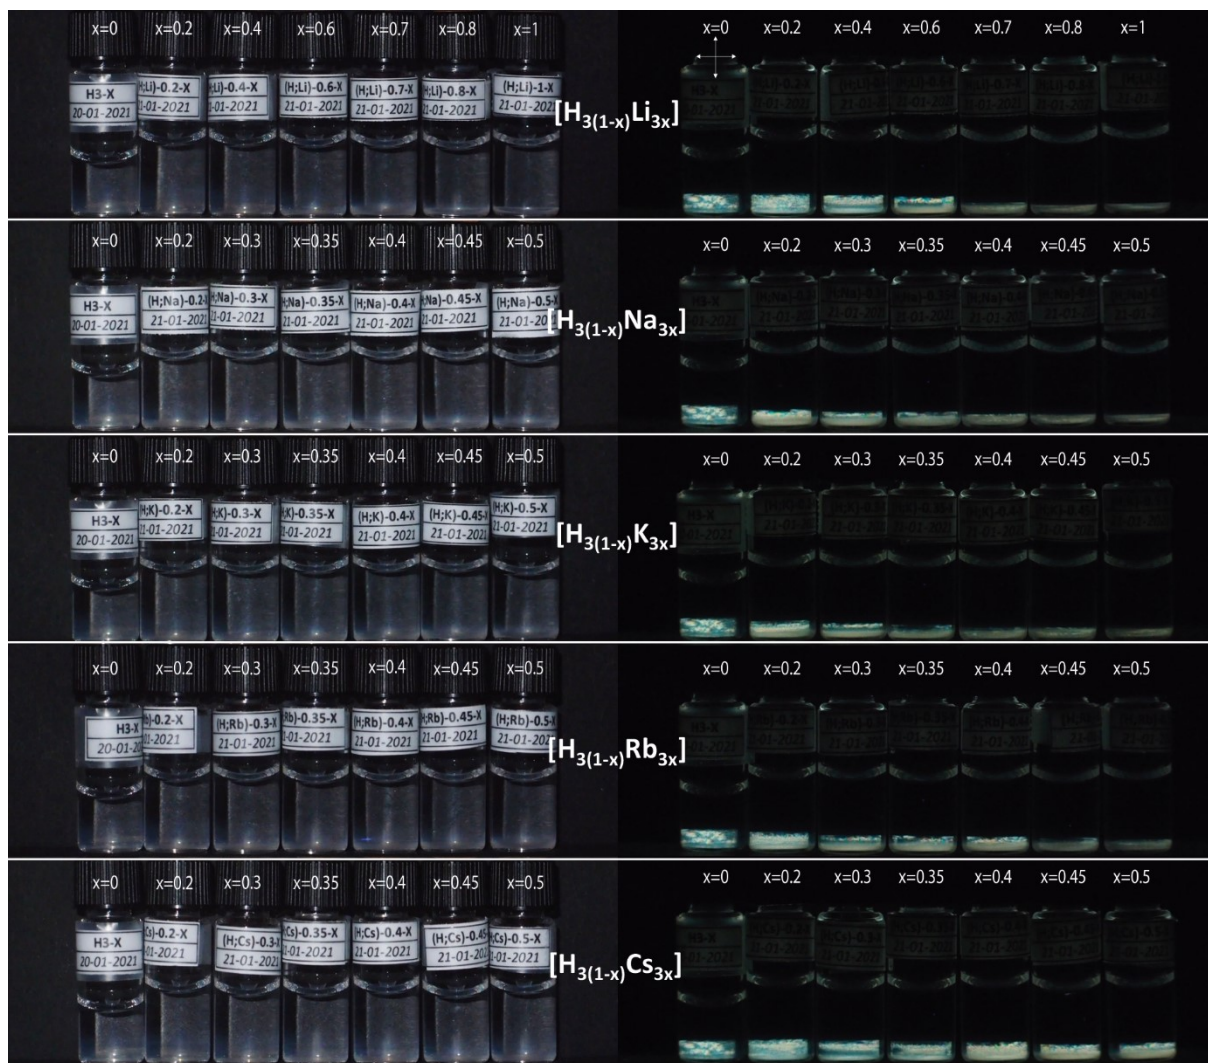

**Figure SI 8.** Photographs of five series of sample tubes observed in natural light (right) and between crossed polarizers (left). For each series, the  $\text{H}_3(1-x)\text{M}_{3x}\text{Sb}_3\text{P}_2\text{O}_{14}$  nanosheet weight fraction is kept constant (0.17 %w/w) but the  $x$  value corresponding to the alkaline cation increases from left to right:  $x = 0, 0.2, 0.4, 0.6, 0.7, 0.8,$  and  $1$  for  $\text{Li}^+$  and  $x = 0, 0.2, 0.3, 0.35, 0.4, 0.45,$  and  $0.5$  for the other cations ( $\text{Na}^+, \text{K}^+, \text{Rb}^+, \text{Cs}^+$ ).



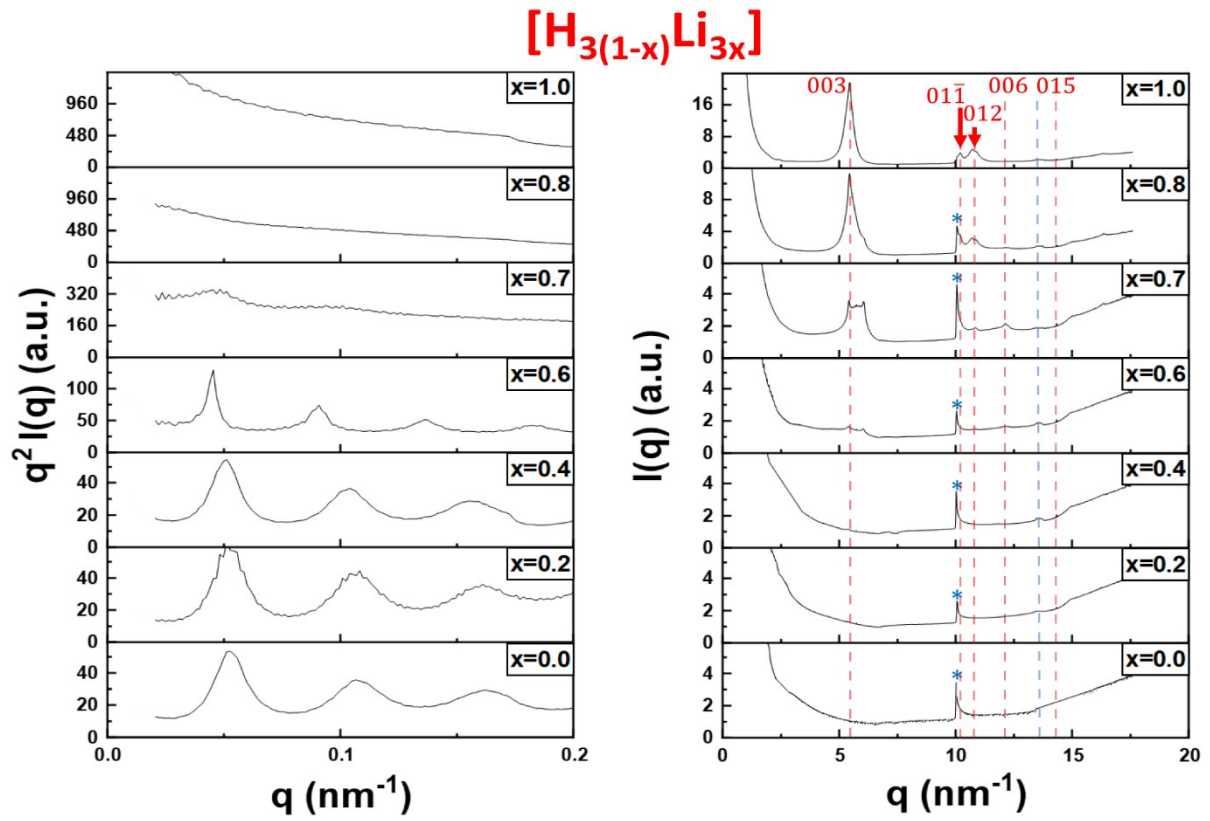

**Figure SI 9.** SAXS (left) and WAXS (right) patterns of the bottom phase of the samples shown in Figure 2 for the  $[H_{3(1-x)}Li_{3x}]$  system.

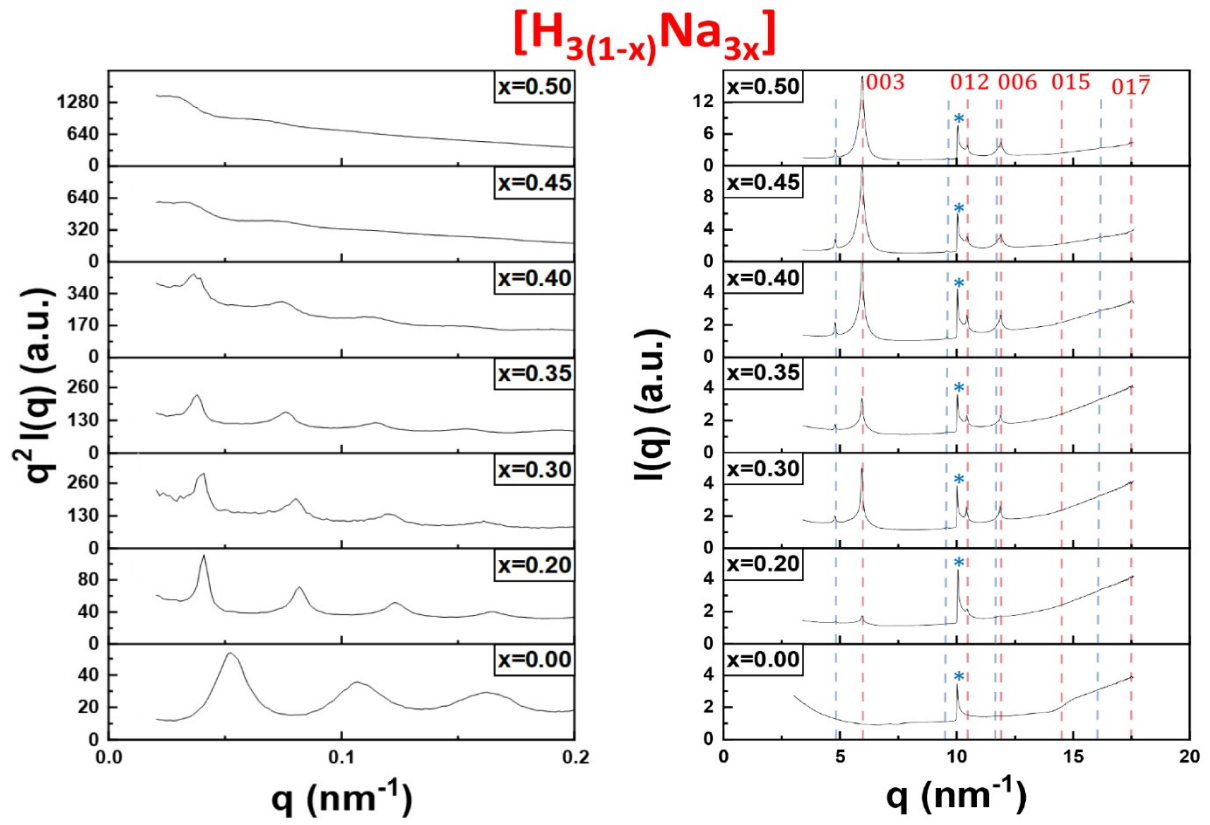

**Figure SI 10.** SAXS (left) and WAXS (right) patterns of the bottom phase of the samples shown in Figure 2 for the  $[H_{3(1-x)}Na_{3x}]$  system.

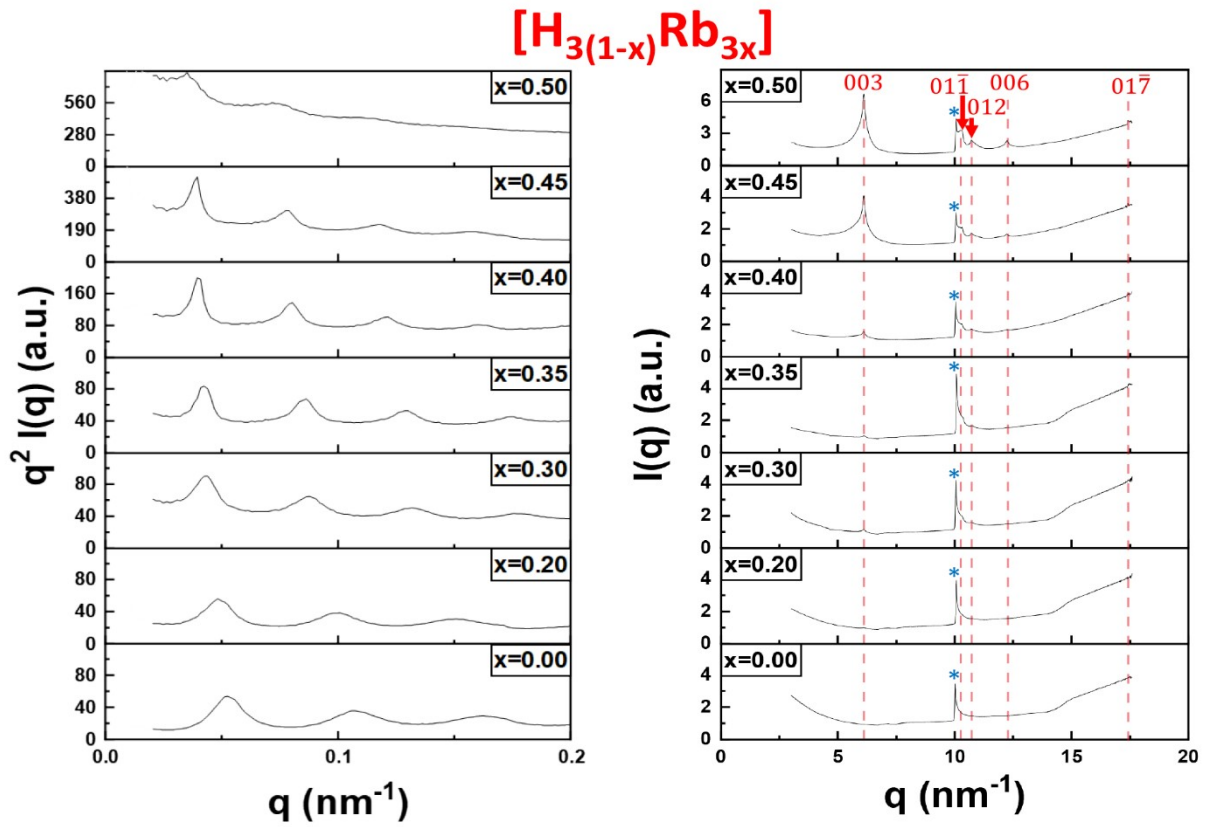

**Figure SI 11.** SAXS (left) and WAXS (right) patterns of the bottom phase of the samples shown in Figure 2 for the  $[\text{H}_{3(1-x)}\text{Rb}_{3x}]$  system.

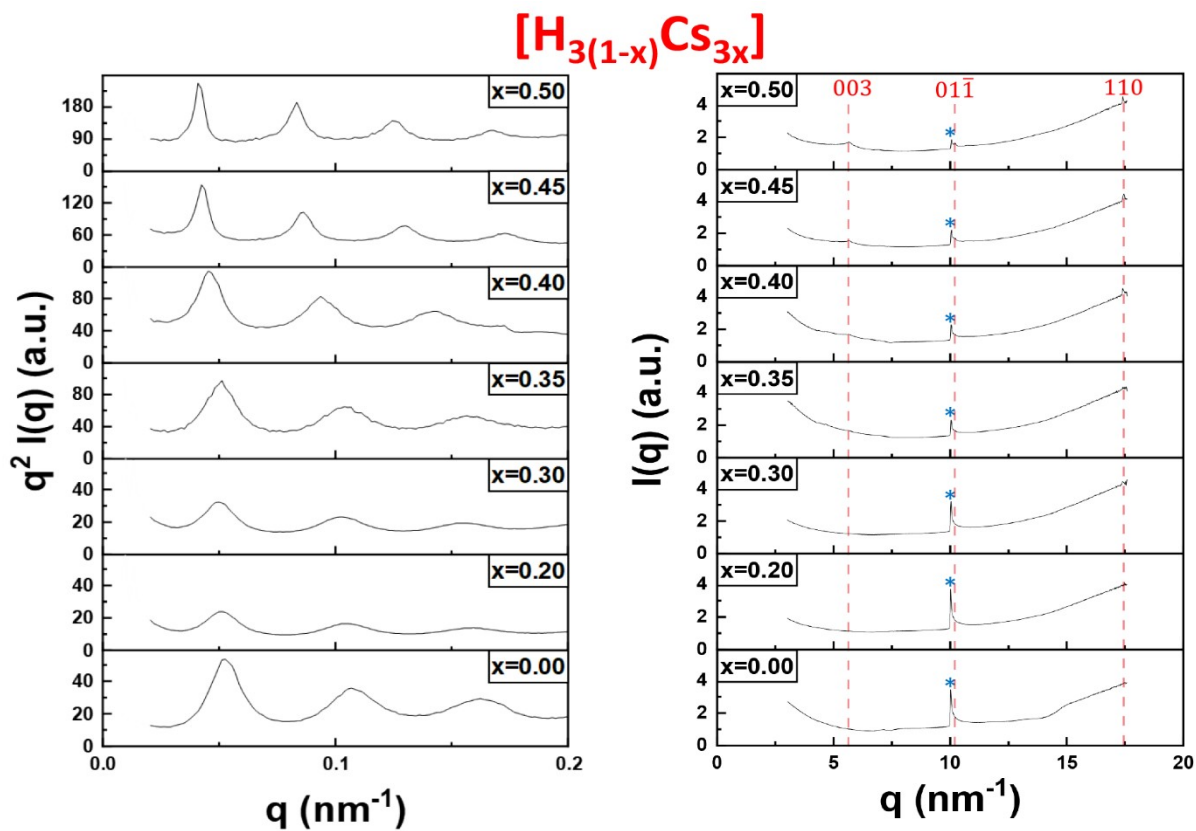

**Figure SI 12.** SAXS (left) and WAXS (right) patterns of the bottom phase of the samples shown in Figure 2 for the [H<sub>3(1-x)</sub>Cs<sub>3x</sub>] system.

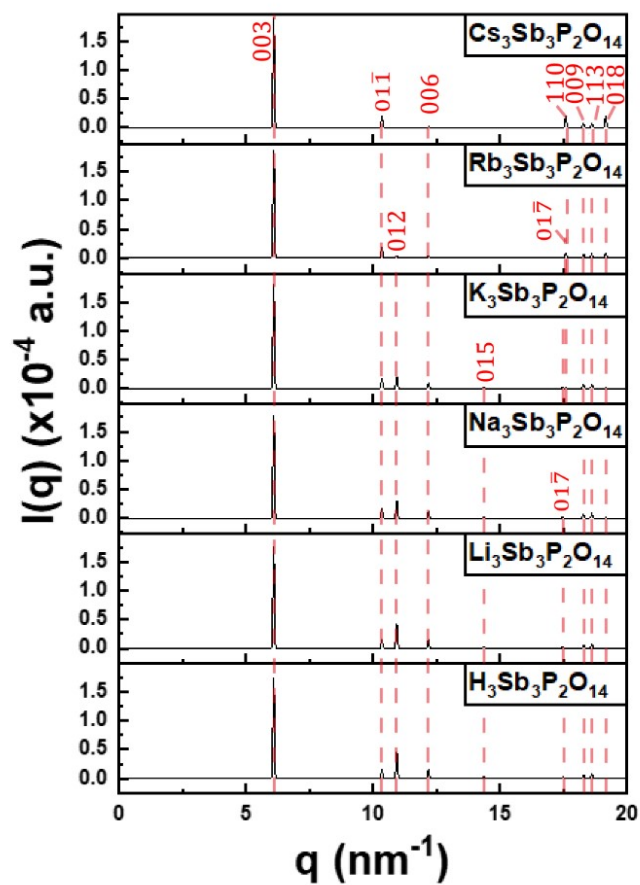

**Figure SI 13.** Simulated X-ray diffraction (XRD) patterns from the crystallographic structure of  $\text{K}_3\text{Sb}_3\text{P}_2\text{O}_{14}$  by replacing potassium with protons or alkaline (Li, Na, Rb, Cs) cations.

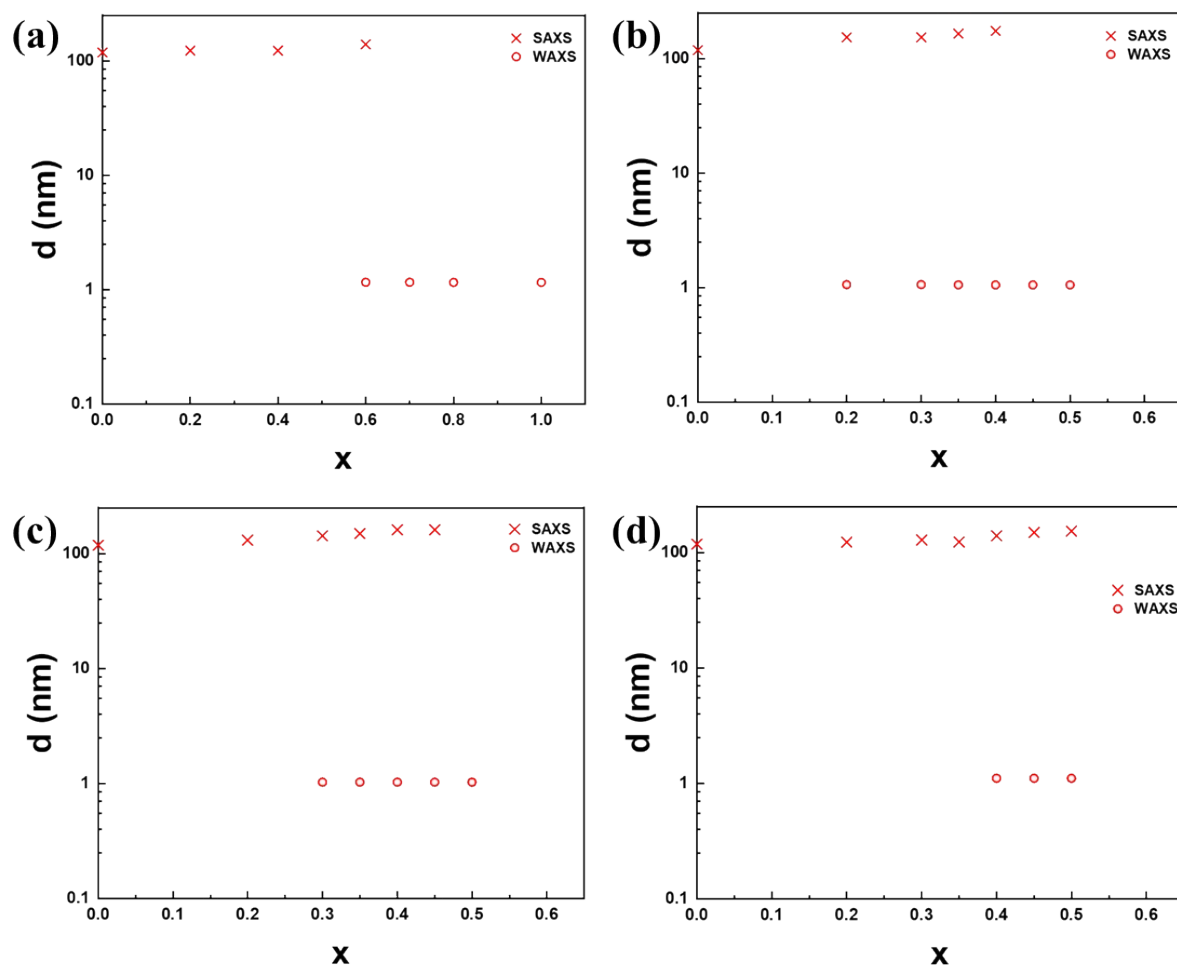

**Figure SI 14.** Dependence of the lamellar period on the cation exchange rate  $x$  for (a)  $\text{H}_{3(1-x)}\text{Li}_{3x}\text{Sb}_3\text{P}_2\text{O}_{14}$ , (b)  $\text{H}_{3(1-x)}\text{Na}_{3x}\text{Sb}_3\text{P}_2\text{O}_{14}$ , (c)  $\text{H}_{3(1-x)}\text{Rb}_{3x}\text{Sb}_3\text{P}_2\text{O}_{14}$  and (d)  $\text{H}_{3(1-x)}\text{Cs}_{3x}\text{Sb}_3\text{P}_2\text{O}_{14}$  samples.

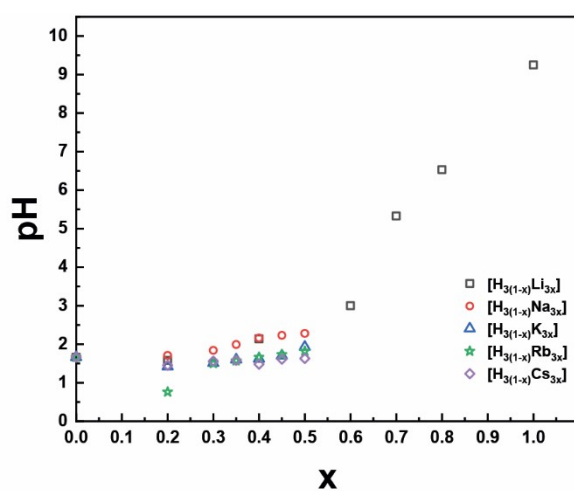

**Figure SI 15.** Dependence of the pH value on the cation exchange rate  $x$  for all series of samples shown in Figure 2 (with constant  $\text{H}_3\text{Sb}_3\text{P}_2\text{O}_{14}$  weight fraction (1.65 %w/w)).

## Fast swelling of $\text{H}_3\text{Sb}_3\text{P}_2\text{O}_{14}$ prepared by reverse cationic exchange of $\text{M}_3\text{Sb}_3\text{P}_2\text{O}_{14}$

- $\text{H}_3\text{Sb}_3\text{P}_2\text{O}_{14}$  from  $\text{K}_3\text{Sb}_3\text{P}_2\text{O}_{14}$

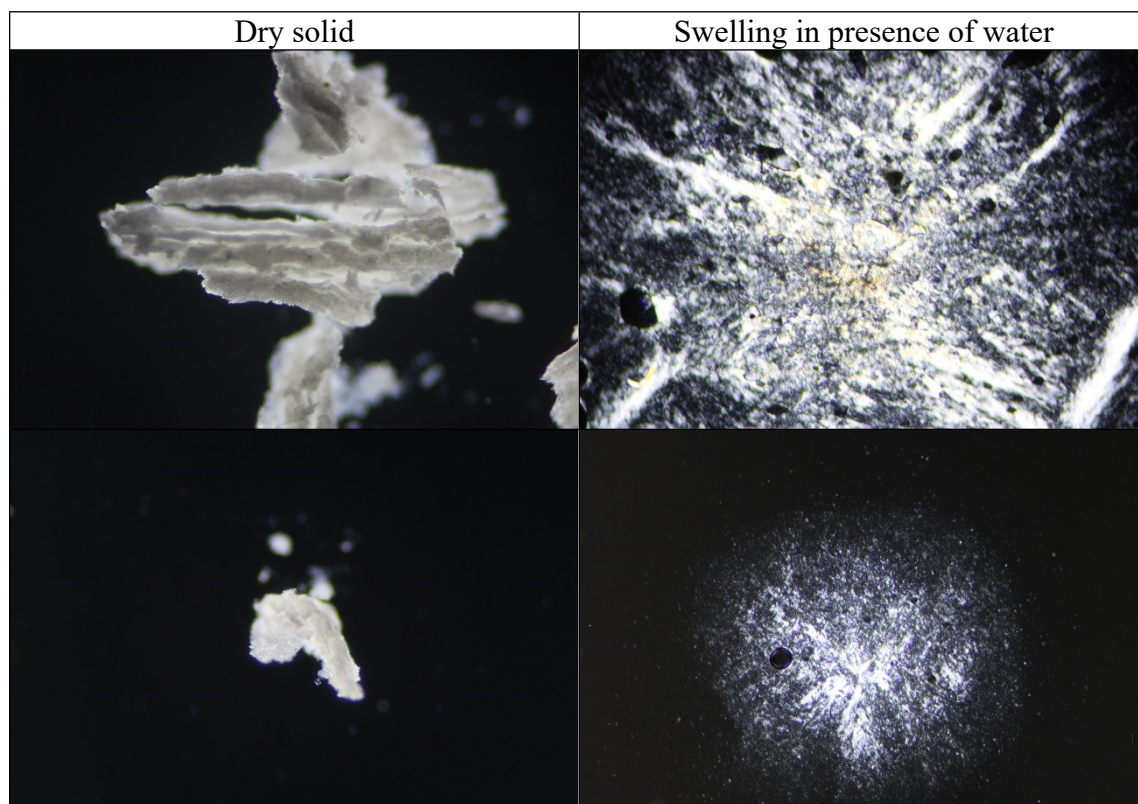

**Table SI 1.** Photographs of  $\text{H}_3\text{Sb}_3\text{P}_2\text{O}_{14}$  prepared by reverse cationic exchange of  $\text{K}_3\text{Sb}_3\text{P}_2\text{O}_{14}$ , observed using an optical microscope with crossed polarizers with a magnification of 10. Left: dry synthesised solid; right: swelling in presence of water.

- $\text{H}_3\text{Sb}_3\text{P}_2\text{O}_{14}$  from  $\text{Na}_3\text{Sb}_3\text{P}_2\text{O}_{14}$

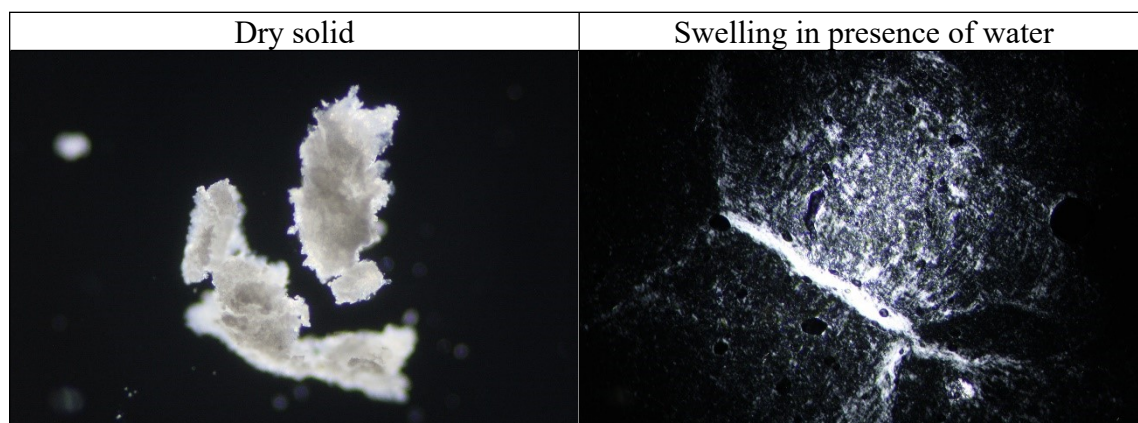

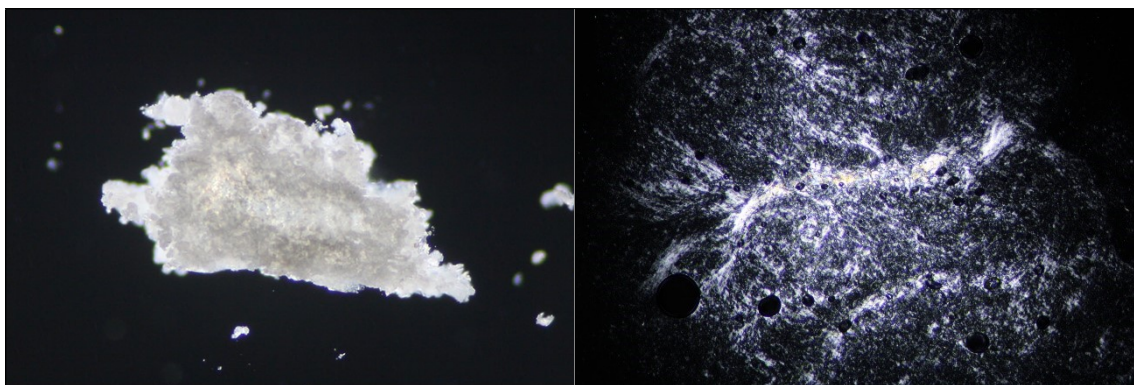

**Table SI 2.** Photographs of  $\text{H}_3\text{Sb}_3\text{P}_2\text{O}_{14}$  prepared by reverse cationic exchange of  $\text{Na}_3\text{Sb}_3\text{P}_2\text{O}_{14}$ , observed using an optical microscope with crossed polarizers with a magnification of 10. Left: dry synthesised solid; right: swelling in presence of water.

- $\text{H}_3\text{Sb}_3\text{P}_2\text{O}_{14}$  from  $\text{Rb}_3\text{Sb}_3\text{P}_2\text{O}_{14}$

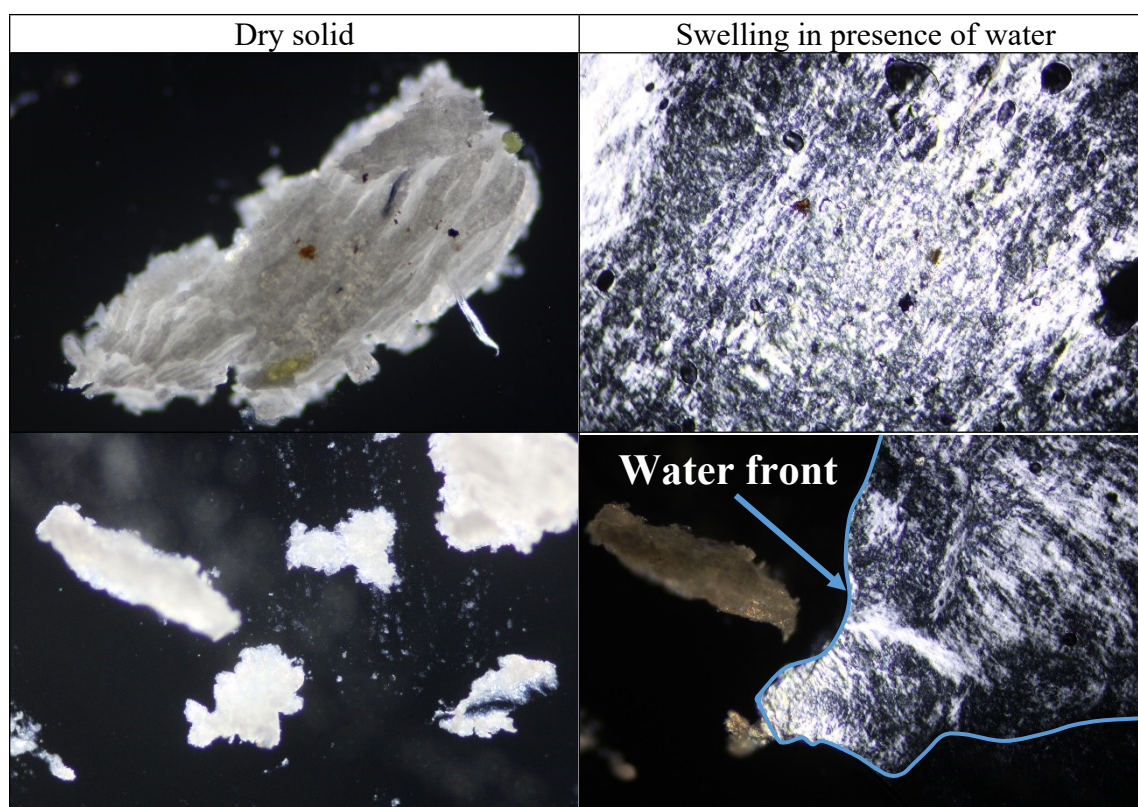

**Table SI 3.** Photographs of  $\text{H}_3\text{Sb}_3\text{P}_2\text{O}_{14}$  prepared by reverse cationic exchange of  $\text{Rb}_3\text{Sb}_3\text{P}_2\text{O}_{14}$ , observed using an optical microscope with crossed polarizers with a magnification of 10. Left: dry synthesised solid; right: swelling in presence of water.

The fast swelling of the  $\text{H}_3\text{Sb}_3\text{P}_2\text{O}_{14}$  phases recovered from  $\text{M}_3\text{Sb}_3\text{P}_2\text{O}_{14}$  restacked materials showed the reversibility of the restacking process.



## SI19: Lamellar Lennard-Jones potential

Let us consider the Lennard-Jones potential that combines van der Waals attraction and volume exclusion repulsion between two atoms at short distance  $r$ :

$$U(r) = \left(\frac{B}{r}\right)^{12} - \left(\frac{C}{r}\right)^6 \quad \text{SI 1}$$

Let us now generalize this potential towards two thin lamellae each with a given atomic density  $\rho$  (number of atoms per unit volume). The van der Waals interaction energy per unit area  $A$  between two parallel slabs of thickness  $h$  and distance  $d$  is obtained by straightforward

integration of Eq. (SI 1) and reads:

$$\frac{U_{vdW}(d)}{A} = -\frac{A_L}{12\pi} \left[ \frac{1}{d^2} - \frac{2}{(d+h)^2} + \frac{1}{(d+2h)^2} \right] \quad \text{SI 2}$$

with  $A_L = \pi^2 \rho^2 C = A_c \phi_{\perp}^2$  (units  $J$ ) which depends on the intrinsic Hamaker constant  $A_c$  of the colloidal material and the intralamellar packing fraction  $\phi_{\perp}$ . For the repulsive part we find similarly:

$$\frac{U_{rep}(d)}{A} = -\frac{B_L}{360\pi} \left[ \frac{1}{d^8} - \frac{2}{(d+h)^8} + \frac{1}{(d+2h)^8} \right] \quad \text{SI 3}$$

with  $B_L = \pi \rho^2 B = B_c \phi_{\perp}^2$  (units  $Jm^6$ ) and  $B_c$  a constant pertaining to the colloidal material. Combining the two and Taylor expanding for  $h/D \ll 1$  we find a Lennard-Jones (LJ) type potential modified for the case of two thin lamellae of thickness  $h$  interacting at a distance  $d \gg h$ :

$$\frac{U_{LLJ}(d)}{A} = -\frac{A_L h^2}{2\pi d^4} + \frac{B_L h^2}{5\pi d^{10}} \quad \text{SI 4}$$

The minimum of the potential occurs at  $d^* = (B_c/A_c)^{1/6}$  which is fixed for a given colloidal material. The minimum of the potential is given by  $U_{mLJ}^*/A = -3A_c \phi_{\perp}^2 h^2 / 10\pi (d^*)^4$  which is proportional to the square of the intralamellar packing fraction  $\phi_{\perp}$ . Similar to the conventional LJ potential, the ‘‘lamellar’’ version (LLJ) can be reexpressed in a rescaled form:

$$\frac{U_{LLJ}(d)}{A} = \varepsilon \phi_{\perp}^2 \left[ 2 \left(\frac{d^*}{d}\right)^{10} - 5 \left(\frac{d^*}{d}\right)^4 \right] \quad \text{SI 5}$$

with amplitude

$$\varepsilon = A_c h^2 / 10\pi (d^*)^4 > 0$$

The LLJ potential reaches a minimum  $-\varepsilon \phi_{\perp}^2$  when  $d = d^*$ .

### SEM-EDX analysis of $M_3Sb_3P_2O_{14}$ restacked phases

Figure SI 16 shows the M/Sb atomic ratio calculated from the EDX atomic composition analysis of restacked  $M_3Sb_3P_2O_{14}$  phases ( $x=1$ ), where  $M = Cs, K, Na$  or  $Rb$ . EDX analysis were not performed on  $Li_3Sb_3P_2O_{14}$  because lithium is too light to be detected by EDX. The expected M/Sb ratio is equal to 1.

#### EDX analysis - M/Sb ratio of Cs3, K3, Na3 and Rb3 ( $H_3(1-x)M_3xSb_3P_2O_{14}$ at $x=1$ )

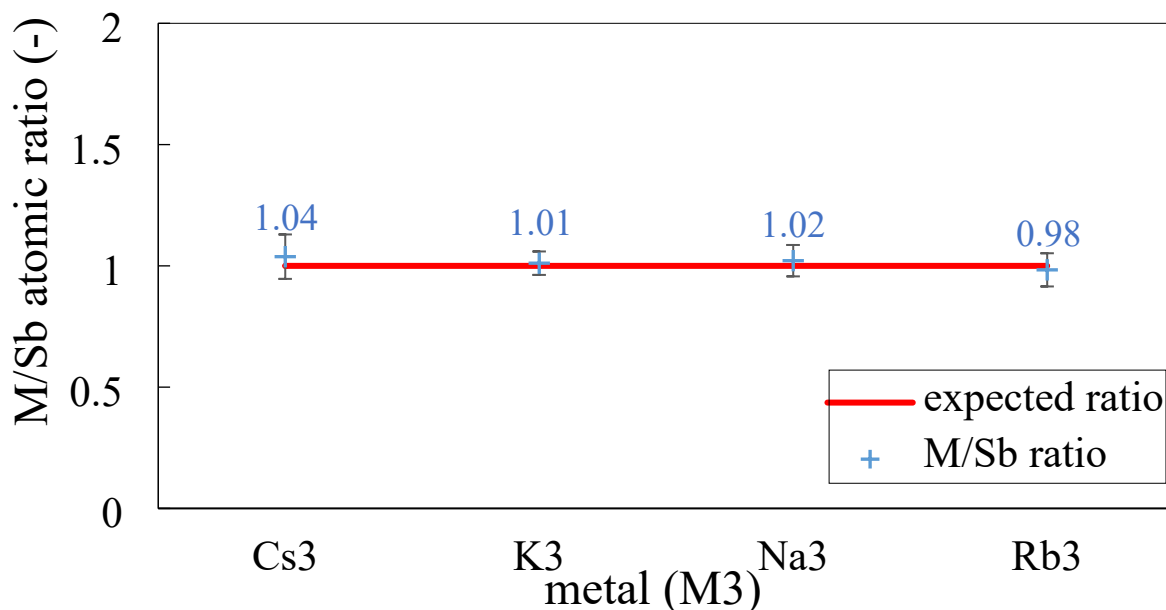

**Figure SI16.** EDX analysis of  $Cs_3Sb_3P_2O_{14}$  (Cs3),  $K_3Sb_3P_2O_{14}$  (K3),  $Na_3Sb_3P_2O_{14}$  (Na3), and  $Rb_3Sb_3P_2O_{14}$  (Rb3) ( $x=1$ ). Calculation of M/Sb atomic ratio (where  $M = Cs, K, Na$  or  $Rb$ ).

The EDX analysis confirmed the expected value of  $x = 1$  for restacked  $M_3Sb_3P_2O_{14}$  phases.
